# Supplementary material for: MEF2c-Dependent Downregulation of Myocilin Mediates Cancer-Induced Muscle Wasting and Associates with Cachexia in Patients with Cancer
Source: Oxford University Press journal article supplement (doi:10.1158/0008-5472.can-19-1558), 2020-03-04
Supplement: 00085472can191558-sup-222535_3_supp_6100266_q5v2dt.xlsx [file 00085472can191558-sup-222535_3_supp_6100266_q5v2dt.xlsx]

## Sheet: Supplemental Table S3.
Correlation Matrix; PDAC patients only
			Survival (days)	BW loss	BMI	Age	Stage	Male?	Low SMI?	SMI	SMA	MYOC	MEF2C	FOXO1	Collagen (%)	Fat (%)
	Spearman r	Survival (days)	1
		BW loss	-0.15758	1
		BMI	0.0706767	-0.34698	1
		Age	0.211676	0.106264	-0.241055	1
		Stage	0.137102	-0.248661	0.109682	-0.412082	1
		Male?	0.165581	-0.307337	0.0610035	-0.253205	0.317821	1
		Low SMI?	-0.196396	0.308221	-0.305505	0.349917	-0.368394	0.0881917	1
		SMI	0.219298	-0.442495	0.305263	-0.61187	0.385027	0.42339	-0.632832	1
		SMA	0.0649123	-0.093809	-0.5	-0.134506	0.23694	0.250185	-0.261861	0.396491	1
		MYOC	0.7	-0.384086	0.0333333	0.37928	0.11847	0.327165	0.0119537	0.265222	-0.0485036	1
		MEF2C	0.243609	-0.0606078	0.233083	0.244068	0.0274204	-0.0610035	-0.109109	0.0877193	-0.1	0.475439	1
		FOXO1	-0.228571	0.286372	-0.233083	0.0979286	-0.301625	-0.0958626	0.392792	-0.452632	-0.184211	-0.178947	-0.494737	1
		Collagen (%)	-0.601754	0.656394	-0.242105	0.0281319	-0.11847	-0.194625	0.394472	-0.494324	-0.234262	-0.593395	-0.526316	0.452632	1
		Fat (%)	-0.464912	0.355951	0.147368	-0.186374	-0.23694	-0.291937	0.298843	-0.203302	-0.294118	-0.389061	0.0122807	-0.0842105	0.275439	1
			Survival (days)	BW loss	BMI	Age	Stage	Male?	Low SMI?	SMI	SMA	MYOC	MEF2C	FOXO1	Collagen (%)	Fat (%)
	P-value	Survival (days)	0
		BW loss	0.507005	0
		BMI	0.767158	0.133914	0
		Age	0.370304	0.655675	0.305922	0
		Stage	0.56435	0.290439	0.645286	0.0710083	0
		Male?	0.48539	0.187461	0.798347	0.281422	0.172084	0
		Low SMI?	0.420331	0.199203	0.203396	0.141941	0.120675	0.719579	0
		SMI	0.367028	0.0578098	0.203773	0.00536685	0.103561	0.0708742	0.00363754	0
		SMA	0.791768	0.70247	0.029258	0.583006	0.328726	0.301584	0.278819	0.0928338	0
		MYOC	0.000847586	0.10448	0.892241	0.109263	0.629062	0.171549	0.962453	0.287484	0.84843	0
		MEF2C	0.300668	0.799629	0.322678	0.299729	0.908641	0.798347	0.656581	0.721024	0.683772	0.039655	0
		FOXO1	0.332397	0.220926	0.322678	0.681263	0.196218	0.687659	0.0962023	0.051663	0.450285	0.463554	0.0265786	0
		Collagen (%)	0.00641467	0.00227026	0.317975	0.908983	0.629062	0.424618	0.105245	0.037044	0.349454	0.00943262	0.0206189	0.051663	0
		Fat (%)	0.0448961	0.134728	0.547136	0.444888	0.328726	0.225217	0.228346	0.418447	0.236143	0.110542	0.960204	0.731783	0.253724	0
			Survival (days)	BW loss	BMI	Age	Stage	Male?	Low SMI?	SMI	SMA	MYOC	MEF2C	FOXO1	Collagen (%)	Fat (%)
	Sample size (n)	Survival (days)	20
		BW loss	20	20
		BMI	20	20	20
		Age	20	20	20	20
		Stage	20	20	20	20	20
		Male?	20	20	20	20	20	20
		Low SMI?	19	19	19	19	19	19	19
		SMI	19	19	19	19	19	19	19	19
		SMA	19	19	19	19	19	19	19	19	19
		MYOC	19	19	19	19	19	19	18	18	18	19
		MEF2C	20	20	20	20	20	20	19	19	19	19	20
		FOXO1	20	20	20	20	20	20	19	19	19	19	20	20
		Collagen (%)	19	19	19	19	19	19	18	18	18	18	19	19	19
		Fat (%)	19	19	19	19	19	19	18	18	18	18	19	19	19	19

## Sheet: Supplemental Table S4.
Correlation Matrix; Non-cancer Controls and PDAC patients
			BW loss	Age	BMI	Male?	SMI	MA	MYOC	MEF2C	FOXO1
	Spearman r	BW loss	1
		Age	0.290779	1
		BMI	-0.396378	-0.159882	1
		Male?	-0.0851685	-0.0678669	0.0515257	1
		SMI	-0.411739	-0.457903	0.355844	0.469042	1
		MA	-0.155915	-0.541868	-0.291979	0.298481	0.479603	1
		MYOC	-0.370905	0.126446	0.0501401	0.045733	0.202206	0.0123663	1
		MEF2C	-0.213144	-0.0943056	0.37323	0.235934	0.276394	0.0820474	0.194398	1
		FOXO1	0.41039	0.344886	-0.359588	-0.0786445	-0.426738	-0.252865	-0.142857	-0.432947	1
			BW loss	Age	BMI	Male?	SMI	MA	MYOC	MEF2C	FOXO1
	P-value	BW loss	0
		Age	0.085342	0
		BMI	0.016698	0.351623	0
		Male?	0.621394	0.694109	0.765366	0
		SMI	0.0155446	0.00646623	0.0388802	0.00513836	0
		MA	0.378572	0.000933066	0.0938229	0.0864072	0.00410305	0
		MYOC	0.0282697	0.469183	0.774848	0.794193	0.259108	0.945545	0
		MEF2C	0.211983	0.584319	0.0249574	0.165964	0.113567	0.644584	0.263131	0
		FOXO1	0.0129172	0.0394018	0.0312388	0.648447	0.0118401	0.14906	0.412974	0.00835317	0
			BW loss	Age	BMI	Male?	SMI	MA	MYOC	MEF2C	FOXO1
	Sample size (n)	BW loss	36
		Age	36	36
		BMI	36	36	36
		Male?	36	36	36	36
		SMI	34	34	34	34	34
		MA	34	34	34	34	34	34
		MYOC	35	35	35	35	33	33	35
		MEF2C	36	36	36	36	34	34	35	36
		FOXO1	36	36	36	36	34	34	35	36	36
